# Supplementary material for: Transcription factor specificity protein (SP) family in renal physiology and diseases
Source: PeerJ. 2025 Jan 20;13:e18820. doi: 10.7717/peerj.18820 (PMC11756367; doi:10.7717/peerj.18820)
Supplement: Supplemental Information 1 [file peerj-13-18820-s001.xls]

## Sheet: SP1
# TF	Target	Type	Reference
SP1	ABCA1	Activation	11264984;17887732
SP1	ABCA1	Unknown	10884428
SP1	ABCB1	Activation	10644769;7565762
SP1	ABCB1	Unknown	10860921;8103518
SP1	ABCB8	Activation	21046154
SP1	ABCC1	Repression	23765166
SP1	ABCC3	Activation	17272513
SP1	ABCC3	Unknown	10772892
SP1	ABCG2	Unknown	21465479
SP1	ACAN	Unknown	12081893
SP1	ACO1	Unknown	16886906
SP1	ACVRL1	Unknown	20587022
SP1	ADA	Unknown	8127716
SP1	ADAM10	Activation	21854868
SP1	ADAM17	Activation	22705645
SP1	ADAM17	Unknown	19772640
SP1	ADAM23	Activation	20851106
SP1	ADH6	Unknown	12004059
SP1	ADIPOQ	Activation	12378384
SP1	ADRA1A	Unknown	10520459
SP1	ADRA2B	Activation	15037199
SP1	ADRB3	Unknown	11316759
SP1	GRK2	Activation	12423667
SP1	AGT	Unknown	12032593
SP1	AGTR1	Activation	22282354
SP1	AGTR1	Repression	22282354
SP1	AGTR1	Unknown	11072083;15507319
SP1	AHR	Repression	16410262
SP1	ALOX12	Activation	9164849
SP1	ALOX12	Unknown	14518567;16118214
SP1	ALOX15B	Unknown	15247906
SP1	ALOX5	Activation	19781662;9062372
SP1	ALOX5	Unknown	10436859;2251250
SP1	AMACR	Unknown	19148275
SP1	APAF1	Unknown	15972851
SP1	APEX1	Repression	18208837
SP1	APEX1	Unknown	7534297
SP1	APLNR	Activation	17309882
SP1	APOA1	Unknown	10829013
SP1	APOC3	Unknown	7640286
SP1	APOE	Unknown	11229886
SP1	APP	Activation	15673661
SP1	APP	Unknown	8015372
SP1	AR	Activation	15661808;18430409
SP1	AR	Unknown	10773882
SP1	AREG	Unknown	14742435
SP1	ARF6	Activation	19642173
SP1	ASPN	Unknown	21528154
SP1	ATF2	Unknown	2145272
SP1	ATM	Unknown	11466608
SP1	ATP2A2	Activation	17597815
SP1	ATP2A2	Unknown	14613864
SP1	ATP2A3	Activation	22851172
SP1	ATP2C1	Activation	15955096
SP1	B4GALT1	Activation	17557191
SP1	B4GALT5	Activation	15263012;16873896
SP1	BACE1	Activation	21712774;22275252
SP1	BACE1	Unknown	15681800;15857888
SP1	BACE2	Unknown	15857888
SP1	BAG2	Unknown	22146591
SP1	BAX	Unknown	11278953
SP1	BCL2	Unknown	10542244
SP1	BDKRB1	Unknown	10842322
SP1	BIRC5	Unknown	17124180;22334592
SP1	BLMH	Activation	21190945
SP1	BRCA1	Unknown	19466541
SP1	BRD7	Activation	19111069
SP1	BRD7	Unknown	16792505
SP1	BSG	Activation	11814679;20384626;20629990
SP1	BTK	Unknown	10362515
SP1	BTS1	Unknown	9030974
SP1	C1QBP	Unknown	11278463
SP1	C4A	Unknown	9574539
SP1	C4B	Unknown	9574539
SP1	CA9	Activation	16270297
SP1	CA9	Unknown	12615703
SP1	CASP3	Unknown	11773055
SP1	CAT	Unknown	11479230
SP1	CAV1	Unknown	10684646
SP1	CBFB	Unknown	9064279
SP1	CBS	Unknown	11415440;14670973;20392694
SP1	CCK	Unknown	8561897
SP1	CCL2	Activation	10644332
SP1	CCL2	Unknown	12488502
SP1	CCL5	Unknown	11259372
SP1	CCNA2	Repression	18368381
SP1	CCND1	Activation	19755513
SP1	CCND1	Unknown	10908361;11024050;22334592;22415074
SP1	CCND2	Activation	9339900
SP1	CCND2	Unknown	11160217
SP1	PROM1	Unknown	22945648
SP1	CD14	Activation	17203216
SP1	CD14	Unknown	11698458
SP1	CD151	Activation	20149781
SP1	CD163	Unknown	10725797
SP1	CD1D	Activation	22419072
SP1	CD28	Unknown	10510368
SP1	CD2AP	Activation	21604172
SP1	CD44	Activation	12972613
SP1	CD83	Unknown	12182451
SP1	ADGRE5	Activation	18329191
SP1	CD99	Activation	17473187
SP1	CDC42BPG	Unknown	15194684
SP1	CDH2	Unknown	15541732
SP1	CDH3	Unknown	19882246
SP1	CDK4	Activation	19017637
SP1	CDK6	Repression	11297539
SP1	CDKN1A	Activation	10878024;12434298;12665570;14527674;15033443;15041706;15961274;17026958
SP1	CDKN1A	Repression	12773551;18210215
SP1	CDKN1A	Unknown	10506225;10649433;14529564;17885207;18270969;21325288;21858218
SP1	CDKN1B	Activation	12907235;15064717;16518840
SP1	CDKN1B	Unknown	10542271;15951157;22415074
SP1	CDKN2A	Activation	21830402
SP1	CDKN2A	Unknown	10649433;17370299
SP1	CDKN2B	Unknown	10649433;7592908
SP1	CENPH	Activation	22682030
SP1	CENPW	Unknown	20180024
SP1	CERS2	Activation	22169644
SP1	CES1	Unknown	11409902
SP1	CETP	Repression	10669650
SP1	CETP	Unknown	12730302
SP1	CFTR	Unknown	16877677
SP1	CHGA	Unknown	1819225
SP1	CHI3L1	Unknown	12933821
SP1	CHRNB4	Unknown	10771000
SP1	CHST4	Activation	22446378
SP1	CIC	Unknown	18706393
SP1	CLDN3	Activation	17986852
SP1	COL11A2	Activation	16734381
SP1	COL18A1	Unknown	11093745
SP1	COL1A1	Unknown	10082137;10091149;10775443;12138160;16564026;7504695;7590335
SP1	COL2A1	Activation	12888570;18065760
SP1	COL2A1	Repression	12888570
SP1	COL7A1	Unknown	10980546;9092567
SP1	COMP	Unknown	11223338
SP1	CREB1	Unknown	17937658
SP1	CREM	Activation	21757709
SP1	CRMP1	Unknown	18524846
SP1	CSNK2A1	Unknown	19027835
SP1	CTGF	Activation	12888575
SP1	CTSB	Unknown	10701774
SP1	CTSL	Activation	11742542
SP1	CXADR	Unknown	22190856
SP1	CXCL1	Unknown	11112786;7479086
SP1	CXCL14	Activation	22382027
SP1	CXCL5	Activation	11559712
SP1	CYP17A1	Unknown	11379008;11463853
SP1	CYP19A1	Unknown	15072557
SP1	CYP1B1	Activation	12801909
SP1	CYP27A1	Activation	11867220
SP1	CYP2F1	Unknown	15860659
SP1	CYP3A4	Unknown	15100175
SP1	CYP3A5	Unknown	11485307
SP1	CYP3A7	Unknown	11495920
SP1	CYP7A1	Unknown	9875228
SP1	CYP7B1	Unknown	11470525
SP1	DBF4	Activation	12420215
SP1	DCK	Unknown	20544528
SP1	DDB1	Unknown	12527763
SP1	DDB2	Unknown	12527763
SP1	DHCR24	Activation	22431021
SP1	DMRT1	Unknown	11870074
SP1	DNASE2	Activation	12694199
SP1	DNMT1	Activation	19211935;20570896
SP1	DNMT1	Repression	20570896
SP1	DNMT1	Unknown	19201992
SP1	DNMT3A	Activation	15362956
SP1	DNMT3B	Activation	15362956
SP1	DPYSL2	Unknown	15207709
SP1	DRG2	Unknown	21296692
SP1	E2F1	Unknown	10446910
SP1	EAPP	Activation	18588995
SP1	EDNRB	Activation	16921166
SP1	EDNRB	Unknown	16623715
SP1	EGF	Unknown	2833511
SP1	EGFR	Repression	18202149
SP1	EGFR	Unknown	10830317;18575762;19538880;21464950
SP1	EGR1	Activation	8349585
SP1	EGR1	Unknown	10826704
SP1	ELF4	Activation	15907486
SP1	ELMO3	Activation	20127720
SP1	ENG	Activation	21146604
SP1	EPO	Activation	14741200
SP1	EPOR	Repression	8521844
SP1	EPOR	Unknown	23577103;7659529
SP1	ERBB2	Activation	12802284;22553354
SP1	ERVW-1	Activation	15888734
SP1	ESR1	Unknown	12237165;21235772
SP1	EZR	Activation	19164283
SP1	F10	Unknown	8567696
SP1	F2R	Unknown	9494121
SP1	F3	Unknown	10707957;8576248
SP1	F7	Unknown	9716591
SP1	FABP6	Unknown	11684682
SP1	FAS	Activation	22084312
SP1	FAS	Unknown	10022897;10871852;9261184;9300785
SP1	FASLG	Activation	12655294
SP1	FASLG	Unknown	14563113;15004200
SP1	FBLN1	Unknown	11829738
SP1	FBN1	Unknown	23860323
SP1	FBP1	Unknown	11023824
SP1	FES	Unknown	8657143
SP1	FGFBP1	Unknown	10871606
SP1	FGFR1	Unknown	23569208
SP1	FGFR3	Unknown	22334592
SP1	FGL2	Unknown	11170750
SP1	FMR1	Activation	16500891
SP1	FMR1	Unknown	10612627;15175277;9328468
SP1	FOLR1	Unknown	12566316
SP1	FOS	Unknown	9528985
SP1	FOXM1	Activation	20372080
SP1	FPGS	Unknown	20072153
SP1	FUT4	Unknown	23959823
SP1	FXR2	Activation	16886907
SP1	GAST	Activation	15613302
SP1	GAST	Unknown	2566164
SP1	GATA3	Unknown	15486968
SP1	GCLC	Activation	15342415;18245173
SP1	GDA	Unknown	11369448
SP1	GDF5	Unknown	24861163
SP1	GFER	Activation	18513187
SP1	GH2	Unknown	1427648
SP1	GIPR	Unknown	16087722
SP1	GJA1	Activation	10421804;19679555
SP1	GM2A	Unknown	10987359
SP1	GPR39	Unknown	17488974
SP1	GRIN1	Unknown	15950782
SP1	GSPT1	Unknown	22580340
SP1	GSTP1	Activation	8557630
SP1	HAS2	Repression	21795679
SP1	HBEGF	Activation	22641673
SP1	HBZ	Unknown	22696638
SP1	HCN2	Activation	19471099
SP1	HCN4	Activation	19471099
SP1	HDAC4	Activation	16280357
SP1	HGF	Activation	9223667
SP1	HIST2H4A	Activation	7779811
SP1	HLA-G	Unknown	11137218
SP1	HMGA1	Activation	17510387
SP1	HMGA1	Unknown	22389255
SP1	HMGA2	Unknown	11802722
SP1	HNF4A	Unknown	23307400
SP1	HOXB7	Unknown	12697323
SP1	HPR	Activation	12088866
SP1	HRAS	Activation	21931711
SP1	HRAS	Unknown	3012774
SP1	HSD11B2	Unknown	17551100
SP1	HSD17B1	Activation	9231796
SP1	HSD17B11	Activation	21549806
SP1	HSD17B2	Activation	16807381;18270252
SP1	HSD17B2	Repression	18270252
SP1	HSD3B1	Activation	8584035
SP1	HTR1A	Unknown	8626793
SP1	HTT	Activation	22399227
SP1	HYAL1	Repression	18718911
SP1	ICAM1	Unknown	15480988
SP1	ID4	Repression	9516472
SP1	IFNGR1	Unknown	11477089
SP1	IGF1R	Unknown	15345673
SP1	IGF2	Activation	11327698
SP1	IGF2	Unknown	10606246;11336542;9610618
SP1	IGFBP1	Unknown	2849945
SP1	IGFBP3	Activation	12200149
SP1	IGFBP4	Unknown	10342835
SP1	IL10	Activation	21309719
SP1	IL10	Unknown	11278848;17202341
SP1	IL2	Unknown	8814256
SP1	IL2RB	Unknown	9199305
SP1	IL3	Unknown	8454603
SP1	IL6	Activation	18502099
SP1	IMPDH2	Unknown	7896827
SP1	INPP5J	Unknown	23443536
SP1	INSR	Activation	1311316;16707431
SP1	INSR	Unknown	7983788
SP1	IRF5	Activation	20127100
SP1	IRS2	Activation	19755487
SP1	IRS2	Unknown	19875459
SP1	ISG20	Unknown	10871365
SP1	ITGA2	Unknown	11238113;11313353
SP1	ITGA5	Activation	18775869
SP1	ITGAD	Activation	10722744
SP1	ITGAV	Repression	23319049
SP1	ITGAV	Unknown	12136940
SP1	ITGAX	Unknown	7678251;8649405
SP1	ITGB2	Unknown	8670251
SP1	ITGB3	Repression	23319049
SP1	IVL	Unknown	15191537;9512462
SP1	KCNH2	Unknown	17311278
SP1	KCNQ2	Activation	20926649
SP1	KCNQ3	Activation	20926649
SP1	KCTD11	Unknown	20591193
SP1	KDR	Repression	16678129
SP1	KIF2C	Activation	18440323
SP1	KISS1	Activation	16260418
SP1	KISS1	Unknown	16964286
SP1	KIT	Unknown	9834219
SP1	KLF8	Unknown	18353772
SP1	KLK3	Activation	15708372
SP1	KRT14	Repression	22911849
SP1	KRT16	Activation	12954631
SP1	KRT18	Unknown	10094831;7537848
SP1	KRT19	Activation	10859317
SP1	KRT5	Activation	12024040
SP1	LAMA1	Unknown	17141338
SP1	LCAT	Unknown	9610763
SP1	LDHA	Activation	9723176
SP1	LDHC	Unknown	18930904
SP1	LDLR	Activation	16303770
SP1	LEP	Activation	18559540
SP1	LMO4	Unknown	23291272
SP1	LOR	Activation	12200429
SP1	LOXL4	Activation	18949373
SP1	LPL	Unknown	18793716;9788252
SP1	LRP5	Activation	20141633
SP1	LSP1	Unknown	9257843
SP1	LTBP4	Unknown	23741501
SP1	LTC4S	Unknown	10722737;10919991
SP1	LTF	Unknown	10845904
SP1	LYZ	Unknown	15504356
SP1	MACROD1	Activation	18206366
SP1	MAOB	Unknown	11259630;20980443
SP1	MAT2A	Activation	11427482
SP1	MAT2A	Unknown	11124935
SP1	MAT2B	Activation	11337507
SP1	MCTS1	Unknown	12938157
SP1	MDM2	Activation	15550242;17214373;17634539
SP1	MDM2	Unknown	18026875;23584477
SP1	ME1	Unknown	9872397
SP1	MET	Activation	11910354;21831840
SP1	MET	Repression	21831840
SP1	MGMT	Unknown	22675172
SP1	MICA	Activation	19139882
SP1	MICB	Activation	19139882
SP1	MICB	Unknown	23527639
SP1	MIF	Activation	18034423
SP1	MME	Unknown	14510963
SP1	MMP11	Activation	22227581
SP1	MMP14	Activation	15592504
SP1	MMP14	Unknown	10721699;17534446
SP1	MMP2	Activation	21469139
SP1	MMP2	Unknown	10506168;15317818;19853299;21045016
SP1	MMP28	Unknown	11574168
SP1	MMP9	Activation	19616522;21963718
SP1	MMP9	Unknown	11060311;18357389;7860222
SP1	MMRN1	Activation	15631312
SP1	MNDA	Unknown	8809111
SP1	MPG	Unknown	10563836
SP1	MPO	Activation	17521322;8662930
SP1	MPO	Unknown	12057865
SP1	MTA1	Activation	21555589
SP1	MUC2	Activation	12077147
SP1	MUC2	Unknown	11212251
SP1	MUC4	Unknown	11418607
SP1	MUC5AC	Activation	12077147
SP1	MUC6	Activation	15979574
SP1	MYBL1	Unknown	10951586
SP1	MYBL2	Unknown	15922873
SP1	MYC	Unknown	2057364;8355712
SP1	MYCN	Activation	14567977
SP1	MYCN	Repression	21123453
SP1	MYCN	Unknown	22815527
SP1	NDUFV1	Activation	17786189
SP1	NDUFV2	Activation	17786189
SP1	NF1	Unknown	10435592;14647436
SP1	NFKB1	Activation	20538607;9151857
SP1	NFKB2	Unknown	7541912
SP1	NKX2-1	Unknown	10684967
SP1	NOL7	Unknown	20206243
SP1	NOS1	Unknown	12237165
SP1	NOS3	Activation	10713142;12270858;18624763
SP1	NOS3	Unknown	15722551
SP1	NPY	Unknown	2376581
SP1	NQO2	Unknown	11154737;15451063
SP1	NR4A1	Unknown	8961265
SP1	NR5A1	Unknown	9013759
SP1	NT5E	Unknown	10428853
SP1	OAT	Unknown	2373169
SP1	ODC1	Unknown	10448078;8132514
SP1	OPRM1	Activation	11675004
SP1	OPRM1	Unknown	17990281
SP1	OXTR	Unknown	22030357
SP1	P2RX4	Repression	11299224
SP1	P4HA1	Activation	21829524
SP1	PADI1	Activation	17851584
SP1	PADI3	Unknown	16671893
SP1	PAX6	Unknown	11574690
SP1	PCK1	Activation	14744869
SP1	PDE6A	Unknown	9770645
SP1	PDE6B	Unknown	11438531
SP1	PDGFB	Unknown	22415074
SP1	PDGFC	Unknown	15247255
SP1	PDHA1	Unknown	8476854
SP1	PDIA2	Activation	8503862
SP1	PELO	Unknown	17669516
SP1	PGLYRP2	Unknown	16714290
SP1	PGR	Activation	10894148
SP1	PHGDH	Activation	18378410
SP1	PLAA	Unknown	18291623
SP1	PLAC1	Unknown	19652226
SP1	PLAT	Unknown	21437359;9851700
SP1	PLAU	Unknown	10361124
SP1	PLAUR	Activation	14660675
SP1	PLAUR	Unknown	11234878;16261846;17317820
SP1	PNOC	Unknown	12062800
SP1	POLD1	Unknown	11375983
SP1	POLD2	Unknown	10978529
SP1	POLE2	Unknown	11433027
SP1	PON1	Activation	15380450
SP1	POR	Activation	8660656
SP1	POR	Repression	8660656
SP1	POR	Unknown	10864447;21900384
SP1	PPL	Activation	19583808
SP1	PPP2R2B	Activation	20533062
SP1	PRKCE	Repression	24825907
SP1	PRM1	Activation	18721868
SP1	PRNP	Activation	18990686
SP1	PRNP	Unknown	23131565
SP1	PRSS50	Activation	18462069
SP1	PSEN1	Unknown	10446206
SP1	PSIP1	Unknown	22019592;23386123
SP1	PTEN	Unknown	22030357
SP1	PTGES	Unknown	20688046
SP1	PTGIR	Activation	19118563
SP1	PTGS2	Activation	15767339
SP1	PTGS2	Repression	15767339
SP1	PTHLH	Activation	8063775
SP1	PTK6	Unknown	11997104
SP1	PTN	Unknown	10962555
SP1	PTTG1	Activation	18339849
SP1	PTTG1	Unknown	14644503
SP1	RARA	Activation	9626663
SP1	RASSF1	Activation	19450668
SP1	RECK	Activation	17828469
SP1	RECK	Unknown	16377629
SP1	RECQL4	Activation	15674334
SP1	RECQL4	Unknown	10552928
SP1	RELA	Activation	20538607;11964305;9151857
SP1	RELA	Unknown	8450395
SP1	RETN	Activation	20360975
SP1	RGN	Repression	21526343
SP1	RORA	Activation	14742449
SP1	RPS3A	Unknown	12463423
SP1	SCNN1B	Unknown	11934701
SP1	SCT	Unknown	15118068
SP1	SCTR	Unknown	14645499
SP1	SERPINB5	Activation	17376297
SP1	SERPINE1	Activation	15039136
SP1	SERPINE1	Unknown	10880342;11251188
SP1	SGPL1	Unknown	21184844
SP1	SIGIRR	Activation	21077278
SP1	SIRT1	Unknown	23843607
SP1	SKP2	Activation	19329185
SP1	SKP2	Unknown	16969077
SP1	SLC13A4	Unknown	23485456
SP1	SLC15A1	Unknown	16616718
SP1	SLC19A1	Activation	15652157
SP1	SLC19A2	Unknown	24525018
SP1	SLC19A3	Activation	15217784
SP1	SLC19A3	Unknown	23989004;24525018
SP1	SLC25A20	Unknown	21130740
SP1	SLC29A1	Repression	18064606
SP1	SLC31A1	Unknown	20159940
SP1	SLC39A1	Unknown	19026724
SP1	SLC39A8	Activation	18556457
SP1	SLC3A2	Unknown	17023546
SP1	SLC4A2	Unknown	23121767
SP1	SLC5A8	Activation	20082847
SP1	SLC7A5	Unknown	17023546
SP1	SLC9A2	Unknown	11254504;17561809
SP1	SMARCA1	Unknown	18243132
SP1	SMPD1	Activation	10224156
SP1	SNAP25	Unknown	18194215
SP1	SNAPC1	Unknown	9644240
SP1	SNRPN	Unknown	16116039
SP1	SOCS1	Activation	20644166
SP1	SOD1	Activation	8921911;9867871
SP1	SOD1	Repression	11724400
SP1	SOD2	Repression	11853549
SP1	SOD2	Unknown	18779124;23500038
SP1	SOX3	Unknown	15656994
SP1	SOX9	Activation	17289023
SP1	SP3	Activation	16024108
SP1	SPN	Activation	8055899
SP1	SPP1	Unknown	11126367
SP1	SPRY2	Unknown	14644509
SP1	SQSTM1	Unknown	9762895
SP1	SRC	Unknown	19112177
SP1	SREBF1	Activation	20179320
SP1	SREBF1	Unknown	15462672
SP1	SRY	Unknown	9582429
SP1	ST6GAL1	Unknown	10814704
SP1	STAR	Unknown	11111087;15129808
SP1	STARD3	Activation	12802284
SP1	STK11	Unknown	22412893;23995788
SP1	SYP	Unknown	12492469
SP1	TAF7	Activation	12364593
SP1	TAF7	Unknown	11340078
SP1	TBX21	Unknown	17075044
SP1	TBXA2R	Unknown	18698092
SP1	TCN2	Unknown	9774437
SP1	TERF2	Activation	19783902
SP1	TERT	Activation	18754863;21132266;21553143
SP1	TERT	Unknown	10637317;14611815;18093727;19843528;19912441
SP1	TF	Unknown	8548503
SP1	TFPI2	Unknown	12446683
SP1	TGFA	Unknown	10828826
SP1	TGFB1	Activation	9580699
SP1	TGFB1	Unknown	22415074;2808430
SP1	TGFBR2	Unknown	10982796;11687969
SP1	TGM4	Unknown	10580145
SP1	TH	Unknown	20124442
SP1	THBD	Activation	22406829
SP1	THBD	Unknown	11036068
SP1	TICAM1	Repression	14960149
SP1	TIMP1	Activation	11830330
SP1	TIMP1	Unknown	15048879;22415074
SP1	TIMP2	Unknown	10764764
SP1	TIMP3	Activation	15468069
SP1	TIMP3	Unknown	20056610
SP1	TINF2	Unknown	9399940
SP1	TK1	Activation	10502302
SP1	TLR2	Activation	18423053
SP1	TLR2	Unknown	18583567
SP1	TMPO	Activation	19747485
SP1	TNC	Activation	15001984
SP1	TNC	Unknown	10618716;16245312
SP1	TNF	Activation	10688670;10913190
SP1	TNF	Repression	12759366
SP1	TNFRSF10B	Activation	20515942
SP1	TNFRSF10B	Unknown	18097593;20354117
SP1	TNFSF10	Repression	21603612
SP1	TNFSF14	Activation	12215452
SP1	TNNI3	Unknown	10652194
SP1	TPMT	Unknown	20350137
SP1	TYMP	Unknown	17805539
SP1	TYMS	Unknown	10875244;9218479
SP1	UBC	Unknown	19733223
SP1	UGCG	Activation	15342415
SP1	UGDH	Activation	16002992
SP1	UGDH	Unknown	12682078
SP1	UGT1A4	Activation	19546240
SP1	UGT2B15	Unknown	20070244
SP1	USP7	Unknown	7642633
SP1	UTRN	Activation	11237613
SP1	VAMP2	Activation	8774732
SP1	VDR	Unknown	15664452
SP1	VEGFA	Activation	10581162;12429844;15217947;15342781;16540671;16982770;21115498
SP1	VEGFA	Repression	11559575
SP1	VEGFA	Unknown	10816575;11731421;12560084;14647449;18575762;23369005;8910439
SP1	VIM	Activation	12771217
SP1	WAS	Unknown	10066431
SP1	WIF1	Repression	18701434
SP1	WRN	Unknown	11896071
SP1	WT1	Activation	18064385
SP1	XIAP	Activation	17121920
SP1	XPC	Unknown	19934262;21507255
SP1	YY1	Activation	22553354

## Sheet: SP2
# TF	Target	Type	Reference
SP2	CD14	Unknown	11698458
SP2	CEACAM1	Repression	15126343
SP2	DNMT3A	Activation	15362956
SP2	DNMT3B	Activation	15362956
SP2	HSD17B2	Repression	18270252
SP2	MAT2A	Unknown	11124935
SP2	MMP9	Repression	17071613
SP2	PAPSS2	Unknown	11931653
SP2	TRA	Unknown	1341900

## Sheet: SP3
# TF	Target	Type	Reference
SP3	ABCA1	Repression	15922656
SP3	ABCA1	Unknown	10884428
SP3	ACE	Unknown	14679188
SP3	AGTR1	Unknown	15507319
SP3	ALOX12	Activation	9164849
SP3	ALPL	Activation	11073119
SP3	ATP2A2	Unknown	14613864
SP3	BIRC5	Unknown	22334592
SP3	BPI	Unknown	14623259
SP3	BSG	Activation	11814679
SP3	BTK	Unknown	10362515
SP3	CA9	Unknown	12615703
SP3	CBS	Unknown	11415440
SP3	CCND1	Unknown	22334592
SP3	CD14	Unknown	11698458
SP3	CD2AP	Activation	21604172
SP3	CD83	Unknown	12182451
SP3	ADGRE5	Activation	18329191
SP3	CDH2	Unknown	15541732
SP3	CDKN1A	Activation	12434298
SP3	CDKN1A	Repression	12773551
SP3	CDKN1A	Unknown	10485470;10649433
SP3	CDKN2A	Unknown	10649433;17370299
SP3	CDKN2B	Unknown	10649433;7592908
SP3	CENPH	Activation	22682030
SP3	CETP	Repression	10669650
SP3	CETP	Unknown	12730302
SP3	CFTR	Unknown	16877677
SP3	CHRNB4	Unknown	10771000
SP3	COL11A2	Activation	16734381
SP3	COL1A1	Unknown	10082137
SP3	COL2A1	Activation	12888570
SP3	COL2A1	Repression	18065760
SP3	CTSB	Unknown	10701774
SP3	CTSL	Activation	11742542
SP3	CYP17A1	Unknown	11463853
SP3	CYP27A1	Activation	11867220
SP3	CYP2F1	Unknown	15860659
SP3	CYP3A5	Unknown	11485307
SP3	CYP3A7	Unknown	11495920
SP3	CYP46A1	Unknown	20930312
SP3	DMRT1	Unknown	11870074
SP3	DNASE2	Activation	12694199
SP3	DNMT3A	Unknown	15362956
SP3	DNMT3B	Unknown	15362956
SP3	EAPP	Repression	18588995
SP3	ERBB2	Activation	22553354
SP3	ETF1	Repression	14563555
SP3	F2R	Unknown	9494121
SP3	FBLN1	Unknown	11829738
SP3	FBP1	Unknown	11023824
SP3	FGFR3	Unknown	22334592
SP3	FOXP3	Repression	20462637
SP3	GDF5	Unknown	24861163
SP3	GIPR	Unknown	16087722
SP3	HBEGF	Activation	22641673
SP3	HDAC4	Activation	16280357
SP3	HGF	Activation	9223667
SP3	HMGA2	Unknown	11802722
SP3	HOXB7	Unknown	12697323
SP3	HSD17B2	Activation	16807381;18270252
SP3	ID4	Repression	9516472
SP3	IGFBP1	Unknown	8776721
SP3	IGFBP3	Activation	12200149
SP3	IGFBP4	Unknown	14767471
SP3	ITGA2	Unknown	11238113
SP3	ITGAD	Activation	10722744
SP3	ITGAV	Unknown	12136940
SP3	KDR	Activation	16574784
SP3	KDR	Repression	16678129
SP3	KLK3	Activation	15708372
SP3	LAMA1	Unknown	17141338
SP3	LCAT	Unknown	9610763
SP3	CNMD	Activation	15107420
SP3	LOR	Repression	12200429
SP3	LPL	Activation	9788252
SP3	LPL	Unknown	18793716
SP3	LTC4S	Unknown	10919991
SP3	MAOB	Unknown	11259630
SP3	MAT2A	Unknown	11124935
SP3	MICB	Unknown	23527639
SP3	MMP2	Unknown	15317818
SP3	MSH6	Activation	14585961
SP3	MUC2	Unknown	11212251
SP3	MUC4	Unknown	11418607
SP3	MUC6	Activation	15979574
SP3	MYCN	Activation	14567977
SP3	NFKB1	Activation	20538607
SP3	NKX2-1	Unknown	10684967
SP3	NOS3	Activation	14555463
SP3	NOX4	Activation	21235713
SP3	OPRM1	Activation	11675004
SP3	PADI1	Activation	17851584
SP3	PADI3	Unknown	16671893
SP3	PLAT	Unknown	21437359
SP3	PLAUR	Unknown	16261846
SP3	RASSF1	Activation	19450668
SP3	RECK	Unknown	16377629
SP3	RELA	Activation	20538607
SP3	RORA	Activation	14742449
SP3	SCT	Unknown	15118068
SP3	SCTR	Unknown	14645499
SP3	SLC19A3	Activation	15217784
SP3	SLC1A3	Unknown	14713304
SP3	SLC9A2	Unknown	17561809
SP3	SOCS3	Unknown	10570957
SP3	SOX18	Repression	18496767
SP3	TCN2	Unknown	9774437
SP3	TFF1	Activation	18543253
SP3	TFF2	Repression	23000412
SP3	TGM4	Unknown	10580145
SP3	TIMP1	Unknown	11830330
SP3	TIMP2	Unknown	10764764
SP3	TPMT	Unknown	20350137
SP3	TRA	Unknown	1341900
SP3	TYMP	Unknown	17805539
SP3	UBC	Unknown	19733223
SP3	UTRN	Activation	11237613
SP3	VEGFA	Unknown	10816575;14647449
SP3	YY1	Activation	22553354

## Sheet: SP4
# TF	Target	Type	Reference
SP4	ASS1	Activation	19934275
SP4	BIRC5	Unknown	22334592
SP4	CCND1	Unknown	22334592
SP4	ERBB2	Activation	22553354
SP4	FGFR3	Unknown	22334592
SP4	KDR	Activation	16574784
SP4	KDR	Repression	16678129
SP4	MAOB	Activation	11259630
SP4	NFKB1	Activation	20538607
SP4	PDE6B	Unknown	11438531
SP4	RELA	Activation	20538607
SP4	YY1	Activation	22553354

## Sheet: SP7
# TF	Target	Type	Reference
SP7	COL11A2	Activation	16734381
